# Supplementary material for: Loss of Down syndrome critical region-1 leads to cholesterol metabolic dysfunction that exaggerates hypercholesterolemia in ApoE-null background
Source: PubMed Central journal article supplement (PMC8142255; doi:10.1016/j.jbc.2021.100697), 2021-04-23
Supplement: mmc1.pdf [file mmc1.pdf]

**Table S1****Animals (*in vivo* studies)**

| Species                                            | Vendor or Source        | Background Strain | Sex |
|----------------------------------------------------|-------------------------|-------------------|-----|
| Wild type (WT)                                     | Clea Japan              | C57BL/6j          | M   |
| <i>Dscr-1<sup>-/-</sup></i>                        | Ryeom and Folkman Lab   | C57BL/6j          | M   |
| <i>ApoE<sup>-/-</sup></i>                          | Maeda Lab, Taconic, USA | C57BL/6j          | M   |
| <i>Dscr-1<sup>-/-</sup> and ApoE<sup>-/-</sup></i> | Minami Lab              | C57BL/6j          | M   |
| <i>DSCR-1-lacZ-hprt; ApoE<sup>-/-</sup></i>        | Minami Lab              | C57BL/6j          | M   |

**Genetically Modified Animals**

|                                 | Species                     | Vendor or Source                | Background Strain |
|---------------------------------|-----------------------------|---------------------------------|-------------------|
| <b>Parent – Male and Female</b> | <i>Dscr-1<sup>-/-</sup></i> | Breeding in our animal facility | C57BL/6j          |

|                                 | Species                   | Vendor or Source                | Background Strain |
|---------------------------------|---------------------------|---------------------------------|-------------------|
| <b>Parent – Male and Female</b> | <i>ApoE<sup>-/-</sup></i> | Breeding in our animal facility | C57BL/6j          |

|                                 | Species                                            | Vendor or Source                | Background Strain |
|---------------------------------|----------------------------------------------------|---------------------------------|-------------------|
| <b>Parent – Male and Female</b> | <i>Dscr-1<sup>-/-</sup> and ApoE<sup>-/-</sup></i> | Breeding in our animal facility | C57BL/6j          |

|                                 | Species                                     | Vendor or Source                | Background Strain |
|---------------------------------|---------------------------------------------|---------------------------------|-------------------|
| <b>Parent – Male and Female</b> | <i>DSCR-1-lacZ-hprt; ApoE<sup>-/-</sup></i> | Breeding in our animal facility | C57BL/6j          |

**Antibodies**

| Target antigen          | Vendor or Source | Catalog # | Working concentration | Persistent ID / URL                                                                                                                                                                                                                                                                                                                             |
|-------------------------|------------------|-----------|-----------------------|-------------------------------------------------------------------------------------------------------------------------------------------------------------------------------------------------------------------------------------------------------------------------------------------------------------------------------------------------|
| CD11b                   | BD Bioscience    | 550282    | 2.5 µg/ml             | <a href="https://wwwbdbiosciences.com/ds/pm/tds/550282.pdf">https://wwwbdbiosciences.com/ds/pm/tds/550282.pdf</a>                                                                                                                                                                                                                               |
| Rat IgG Alexa Fluor 488 | ThermoFisher     | A21208    | 2 µg/ml               | <a href="https://www.thermofisher.com/order/genome-database/dataSheetPdf?producttype=antibody&amp;productssubtype=antibody_secondary&amp;productId=A-21208&amp;version=99">https://www.thermofisher.com/order/genome-database/dataSheetPdf?producttype=antibody&amp;productssubtype=antibody_secondary&amp;productId=A-21208&amp;version=99</a> |
| LDLR                    | Abcam            | Ab52818   | 1.4 µg/ml             | <a href="https://www.abcam.co.jp/ldl-receptor-antibody-ep1553y-ab52818.pdf">https://www.abcam.co.jp/ldl-receptor-antibody-ep1553y-ab52818.pdf</a>                                                                                                                                                                                               |
| Actin                   | Sigma            | A1978     | 1 µg/ml               | <a href="https://www.sigmaaldrich.com/content/dam/sigma-aldrich/docs/Sigma/Datasheet/6/a1978dat.pdf">https://www.sigmaaldrich.com/content/dam/sigma-aldrich/docs/Sigma/Datasheet/6/a1978dat.pdf</a>                                                                                                                                             |
| Rabbit IgG (H+L)-       | ThremoFisher     | A11008    | 2 µg/ml               | <a href="https://www.thermofisher.com/order/genome-database/dataSheetPdf?producttype=antibody&amp;">https://www.thermofisher.com/order/genome-database/dataSheetPdf?producttype=antibody&amp;</a>                                                                                                                                               |

|                         |                                        |         |            |                                                                                                                                                                                                                                                                                                                                               |
|-------------------------|----------------------------------------|---------|------------|-----------------------------------------------------------------------------------------------------------------------------------------------------------------------------------------------------------------------------------------------------------------------------------------------------------------------------------------------|
| Alexa Fluor488          |                                        |         |            | roductsubtype=antibody_secondary&productId=A-11008&version=99                                                                                                                                                                                                                                                                                 |
| Rat IgG Alexa Fluor 594 | ThermoFisher                           | A21209  | 2µg/ml     | <a href="https://www.thermofisher.com/order/genome-database/dataSheetPdf?producttype=antibody&amp;productsubtype=antibody_secondary&amp;productId=A-21209&amp;version=99">https://www.thermofisher.com/order/genome-database/dataSheetPdf?producttype=antibody&amp;productsubtype=antibody_secondary&amp;productId=A-21209&amp;version=99</a> |
| Rabbit IgG-HRP          | Sigma                                  | A9169   | 1µg/ml     | <a href="https://www.sigmaaldrich.com/content/dam/sigma-aldrich/docs/Sigma/Datasheet/7/a9169-074h4802dat.pdf">https://www.sigmaaldrich.com/content/dam/sigma-aldrich/docs/Sigma/Datasheet/7/a9169-074h4802dat.pdf</a>                                                                                                                         |
| Mouse IgG-HRP           | Sigma                                  | A9044   | 1µg/ml     | <a href="https://www.sigmaaldrich.com/content/dam/sigma-aldrich/docs/Sigma/Datasheet/6/a9044dat.pdf">https://www.sigmaaldrich.com/content/dam/sigma-aldrich/docs/Sigma/Datasheet/6/a9044dat.pdf</a>                                                                                                                                           |
| CD31                    | BD Bioscience                          | 550274  | 0.078µg/ml | <a href="https://wwwbdbiosciences.com/ds/pm/tds/550274.pdf">https://wwwbdbiosciences.com/ds/pm/tds/550274.pdf</a>                                                                                                                                                                                                                             |
| <i>lacZ</i>             | MBL                                    | PM049   | 5 µg/ml    | <a href="https://ruo.mbl.co.jp/bio/dtl/dtlfiles/PM049-v3.pdf">https://ruo.mbl.co.jp/bio/dtl/dtlfiles/PM049-v3.pdf</a>                                                                                                                                                                                                                         |
| DSCR-1                  | Institute of Immunology, Co.Ltd, Japan | N2838   | 5 µg/ml    | Originally generated from Minami and Kodama Lab ( <i>J.Biol.Chem.</i> 281: 20503-20 2006)                                                                                                                                                                                                                                                     |
| hSREBP2                 | Institute of Immunology, Co.Ltd, Japan |         | 1 µg/ml    | Originally generated from Sakai Lab. (jmsakai@med.tohoku.ac.jp)                                                                                                                                                                                                                                                                               |
| mSREBP2                 | Abcam                                  | ab30682 | 1 µg/ml    | <a href="https://www.abcam.com/SREBP2-antibody-ab30682.html">https://www.abcam.com/SREBP2-antibody-ab30682.html</a>                                                                                                                                                                                                                           |

### DNA/cDNA Clones

| Clone Name | Sequence                                                                                                                    | Source / Repository |
|------------|-----------------------------------------------------------------------------------------------------------------------------|---------------------|
| CA-mPCSK9  | Primers for mutagenesis<br>Pcsk9-D377Y-FW:<br>TCCAGTTACTGCAGCACATGCTTCATG<br>Pcsk9-D377Y-RV:<br>GCTGCAGTAACTGGACGCTCCGATGAT | Minami lab          |

### siRNA

| Clone Name                                       | Sequence                                                           | Source / Repository                                                                                 |
|--------------------------------------------------|--------------------------------------------------------------------|-----------------------------------------------------------------------------------------------------|
| Si-DSCR-1<br>(targeted both DSCR-1s and DSCR-1L) | 5'-CAGAAACUCAGUCUUUAUGCAGCUGG-3'<br>5'-CCAGCUGCAUAAGACUAGUUUCUG-3' | Stealth siRNA, Specificity and efficacy was validated from <i>J.Biol.Chem.</i> 281: 20503-20 (2006) |

### Cultured Cells

| Name   | Vendor or Source | Persistent ID / URL |
|--------|------------------|---------------------|
| HEK293 | ATCC             | CRL-1573            |
| HepG2  | ATCC             | CRL-10741           |

### Data & Code Availability

| Description                                  | Source / Repository | Persistent ID / URL                                                                                                                     |
|----------------------------------------------|---------------------|-----------------------------------------------------------------------------------------------------------------------------------------|
| Liver tissue microarray analysis             | GSE172283           | <a href="https://www.ncbi.nlm.nih.gov/geo/query/acc.cgi?acc=GSE172283">https://www.ncbi.nlm.nih.gov/geo/query/acc.cgi?acc=GSE172283</a> |
| Aortic endothelial cells microarray analysis | GSE172283           | <a href="https://www.ncbi.nlm.nih.gov/geo/query/acc.cgi?acc=GSE172283">https://www.ncbi.nlm.nih.gov/geo/query/acc.cgi?acc=GSE172283</a> |

## Real-time PCR primers

| Primer name                  | Sequence                 |
|------------------------------|--------------------------|
| <i>Dscr-1-Forward</i>        | GACAAACAGTTCCTCATCTCCC   |
| <i>Dscr-1-Reverse</i>        | CATCTCTTCCTCTTCCTCCTCA   |
| <i>Ceruloplasmin-Forward</i> | CAACAGTATGTGTATGTGCTGCAT |
| <i>Ceruloplasmin-Reverse</i> | AGATACCAGCTGAGATTTTCATCC |
| <i>Msr1-Forward</i>          | CTGGACAAACTGGTCCACCT     |
| <i>Msr1-Reverse</i>          | TCCCCTTCTCTCCCTTTTGT     |
| <i>Vcam-1-Forward</i>        | GAACCCAAACAGAGGCAGAGTG   |
| <i>Vcam-1-Reverse</i>        | GGACTGCCCTCCTCTAGTATAGGA |
| <i>Icam-1-Forward</i>        | GGTGACTGAGGAGTTCGACAGAA  |
| <i>Icam-1-Reverse</i>        | TCTGCGTCTCCAGGATCTGG     |
| <i>Ppia-Forward</i>          | ATCTTGTCCATGGCAAATGCTG   |
| <i>Ppia-Reverse</i>          | AAACGCTCCATGGCTTCCAC     |

## Other

| Description                        | Source / Repository | Persistent ID / URL |
|------------------------------------|---------------------|---------------------|
| AAV-pro Helper Free system (AAV5)  | Takara Bio          | Cat#: 6650          |
| pAd/CMV/V5-DEST Gateway Vector kit | ThermoFisher        | Cat#: V49320        |

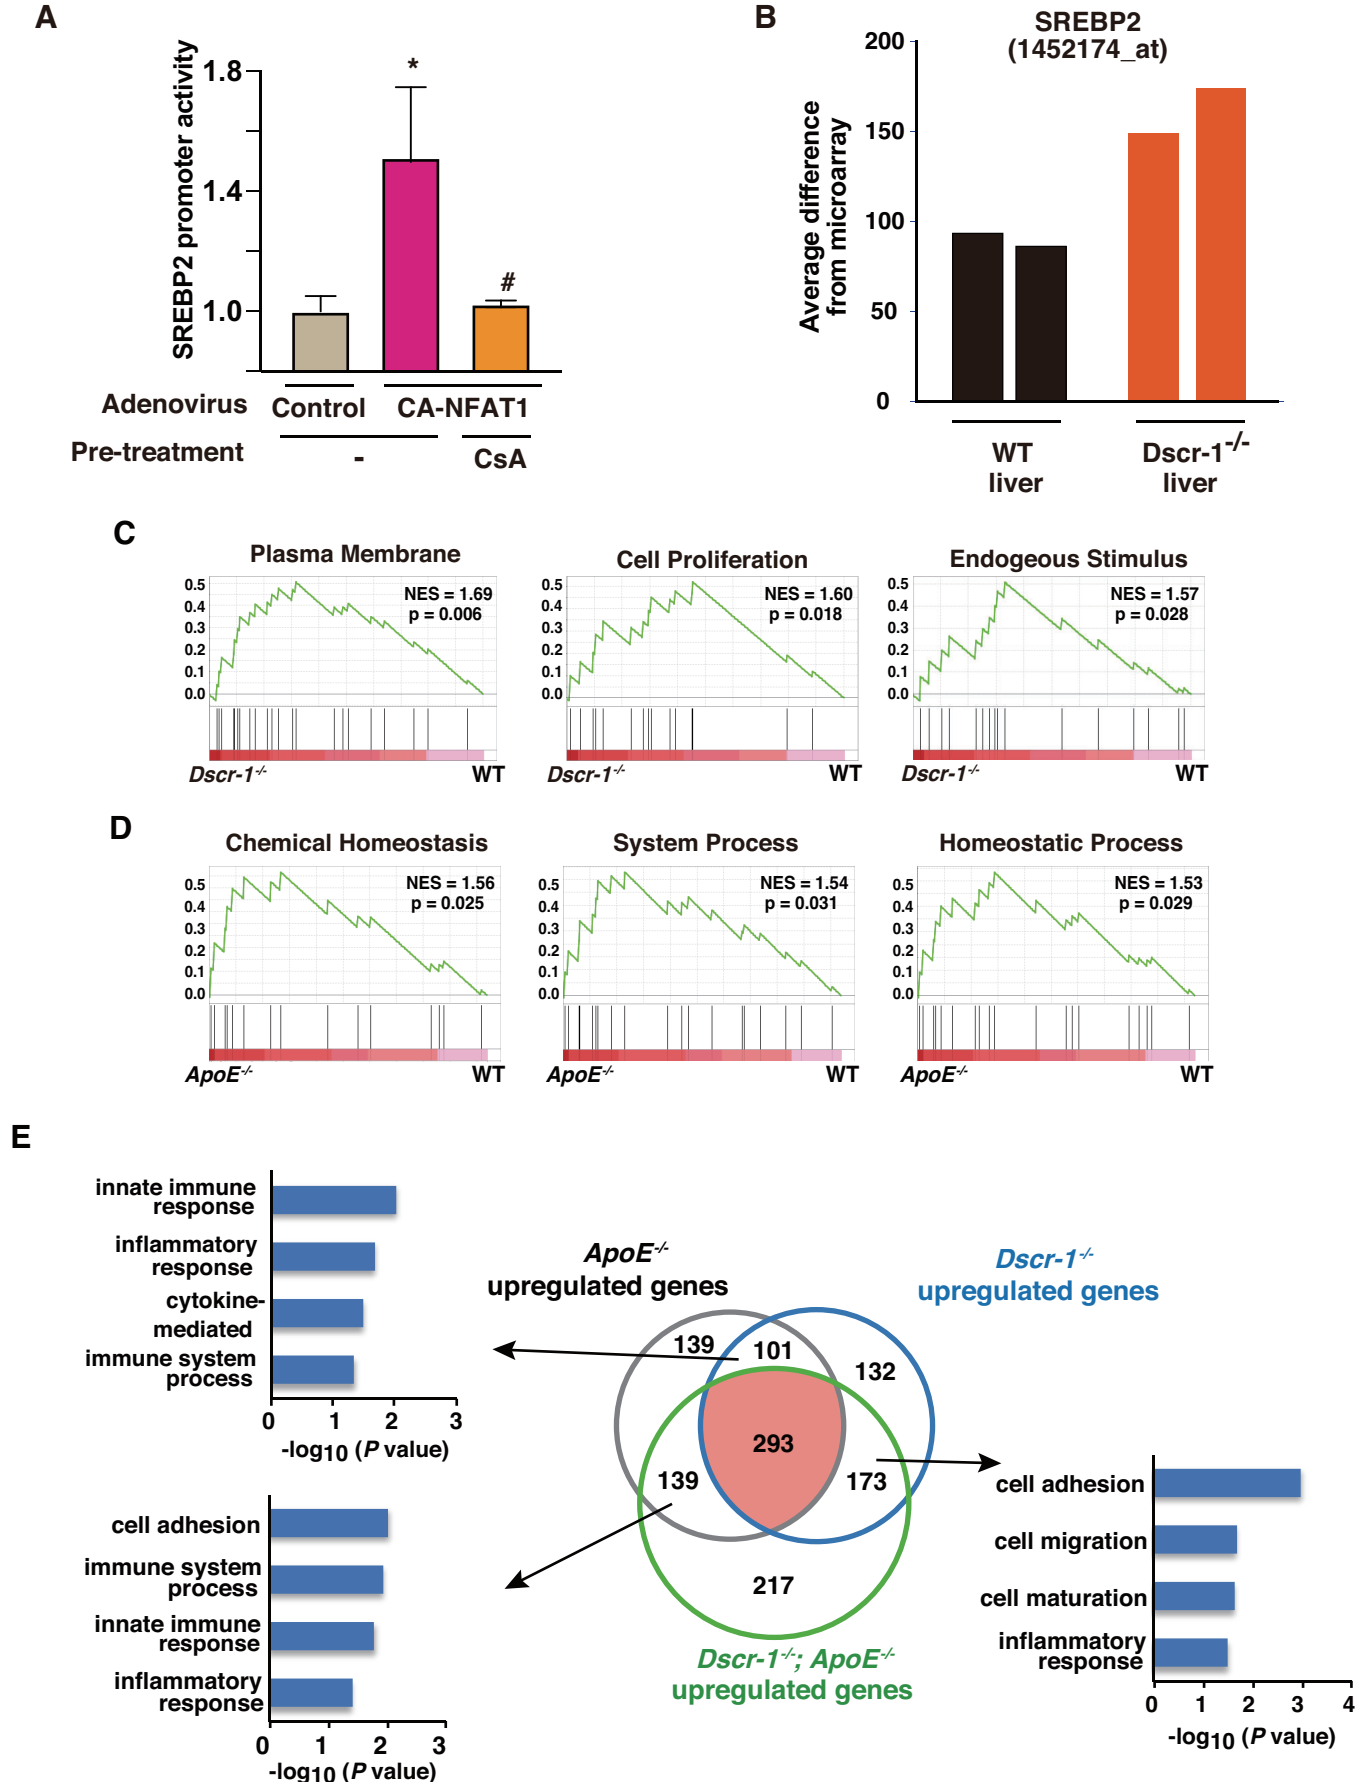

**Figure S1** *Dscr-1* null mutation increases SREBP2 and changes cellular homeostasis gene set in liver.

(A) SREBP2-luc activities relative to Ad-control (n=3, mean± SD), \**P*<0.05 compared with WT, #*P*<0.05 compared with CA-NFAT1 in the absence of CsA treatment. (B) Average differences of SREBP2 from two independent samples in liver. (C and D) GSEA pathway analysis of upregulated genes data set from *Dscr-1*<sup>-/-</sup> (C) or *ApoE*<sup>-/-</sup> (D) compared with WT. NES; ApoE, *Dscr-1* normalized enrichment score. (E) Venn diagrams of more than 2-fold upregulated gene volume in liver from null mutation of either and both of them. GO pathway analysis of commonly upregulated genes data set from *ApoE*<sup>-/-</sup> and *Dscr-1*<sup>-/-</sup> (upper-left), *ApoE*<sup>-/-</sup> and *Dscr-1*<sup>-/-</sup> plus *ApoE*<sup>-/-</sup> double knockout (lower-left), and *Dscr-1*<sup>-/-</sup> and *Dscr-1*<sup>-/-</sup> plus *ApoE*<sup>-/-</sup> knockout (lower-right).

**A**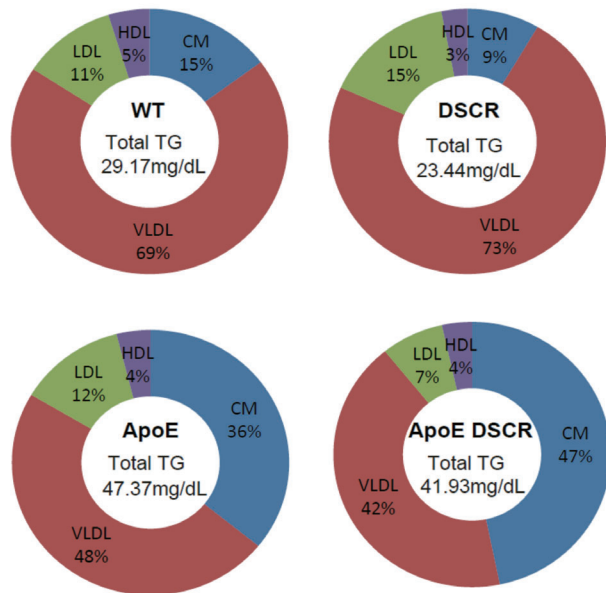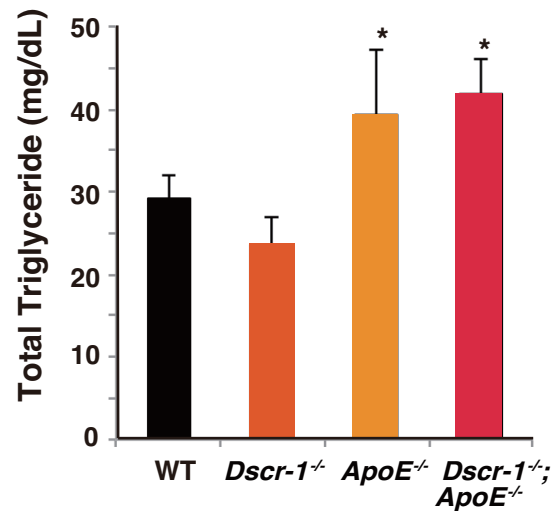**B**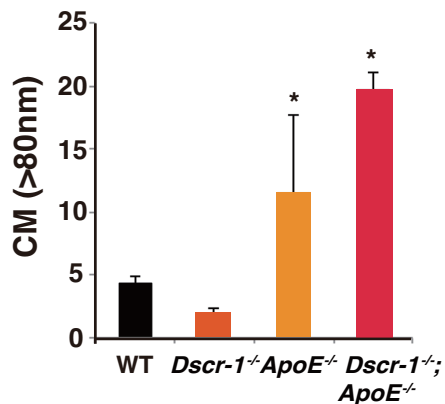**C**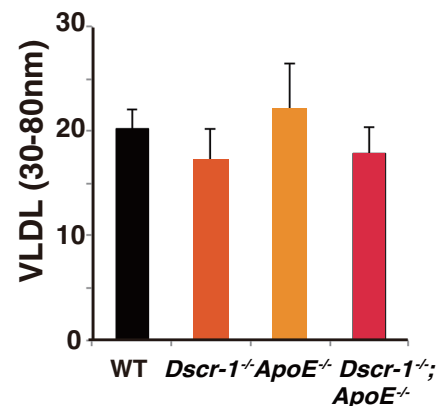**D**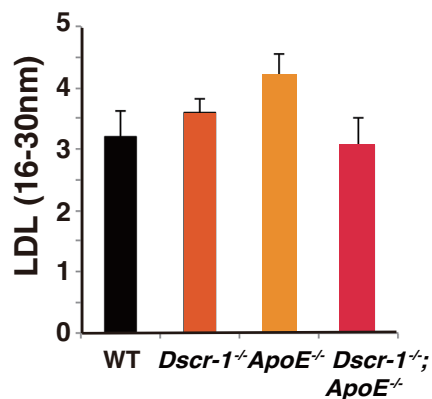**E**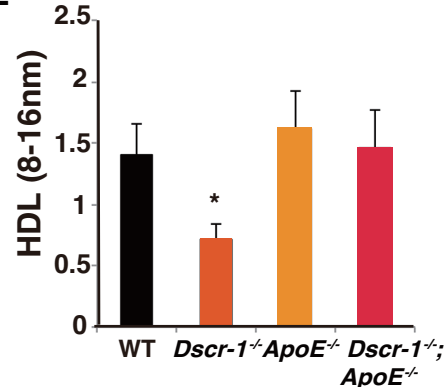

**Figure S2 Lipid profiles in *Dscr-1*, *ApoE*, and the double null mutation mice.**

(A) Pie chart of total triglycerides (TG) from either or combined null mutation of *Dscr-1* and *ApoE*, and littermate control (WT) after a high fat diet fed for 8 weeks. (B-E). Total TG volume and contents (B: chylomicron (CM), C: VLDL, D: LDL, E: HDL) were shown in pie chart. Graph value means total or indicated each content volume (mg/dL) (n=12, mean ± SD) \*,  $P < 0.05$  compared with WT.

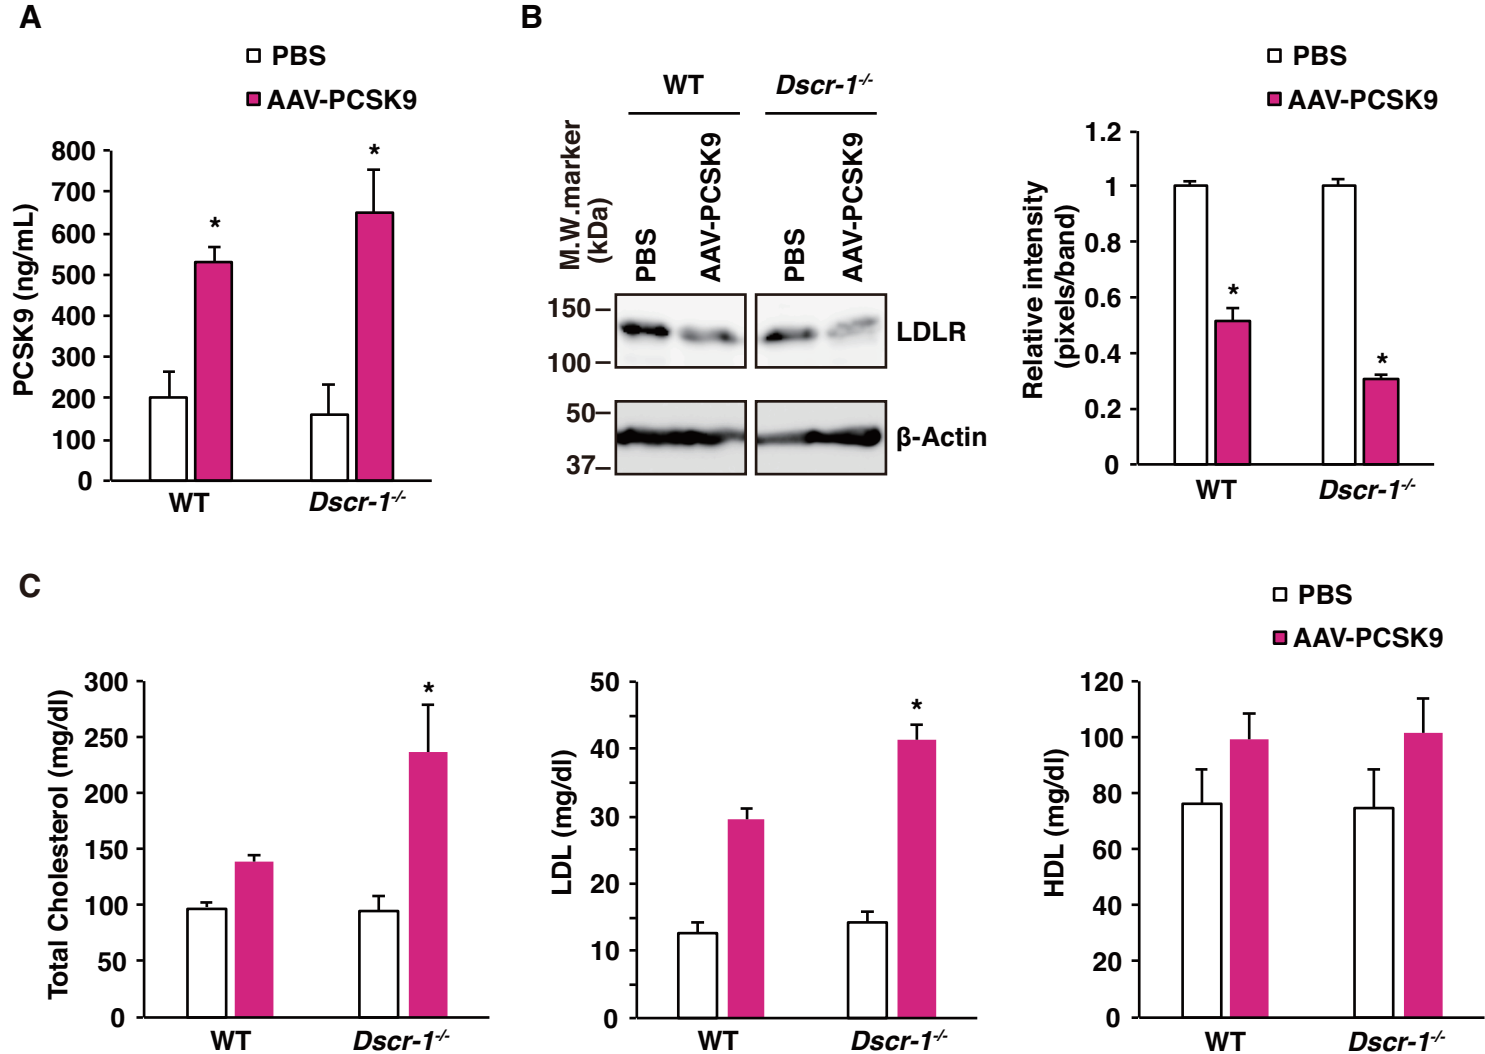

**Figure S3 Loss of *Dscr-1* exaggerates hypercholesterolemia with adeno-associated virus (AAV)-mediated PCSK9 overexpression.**

(A) Serum PCSK9 levels at 7 days after the AAV administration. (B) Western blot of anti-LDLR antibody from total liver extracts.  $\beta$ -Actin indicates the loading control. *Right* bar graph; LDLR quantification from the western blots (*left*) ( $n=3$ , mean  $\pm$  SD). \*,  $P < 0.05$  compared in the mock (PBS) treatment. (C) Quantification of total cholesterol (*left*), LDL (*middle*), and HDL (*right*) from indicated conditions ( $n=3$ , mean  $\pm$  SD). \*,  $P < 0.05$  compared with the AAV treatment in WT mice.

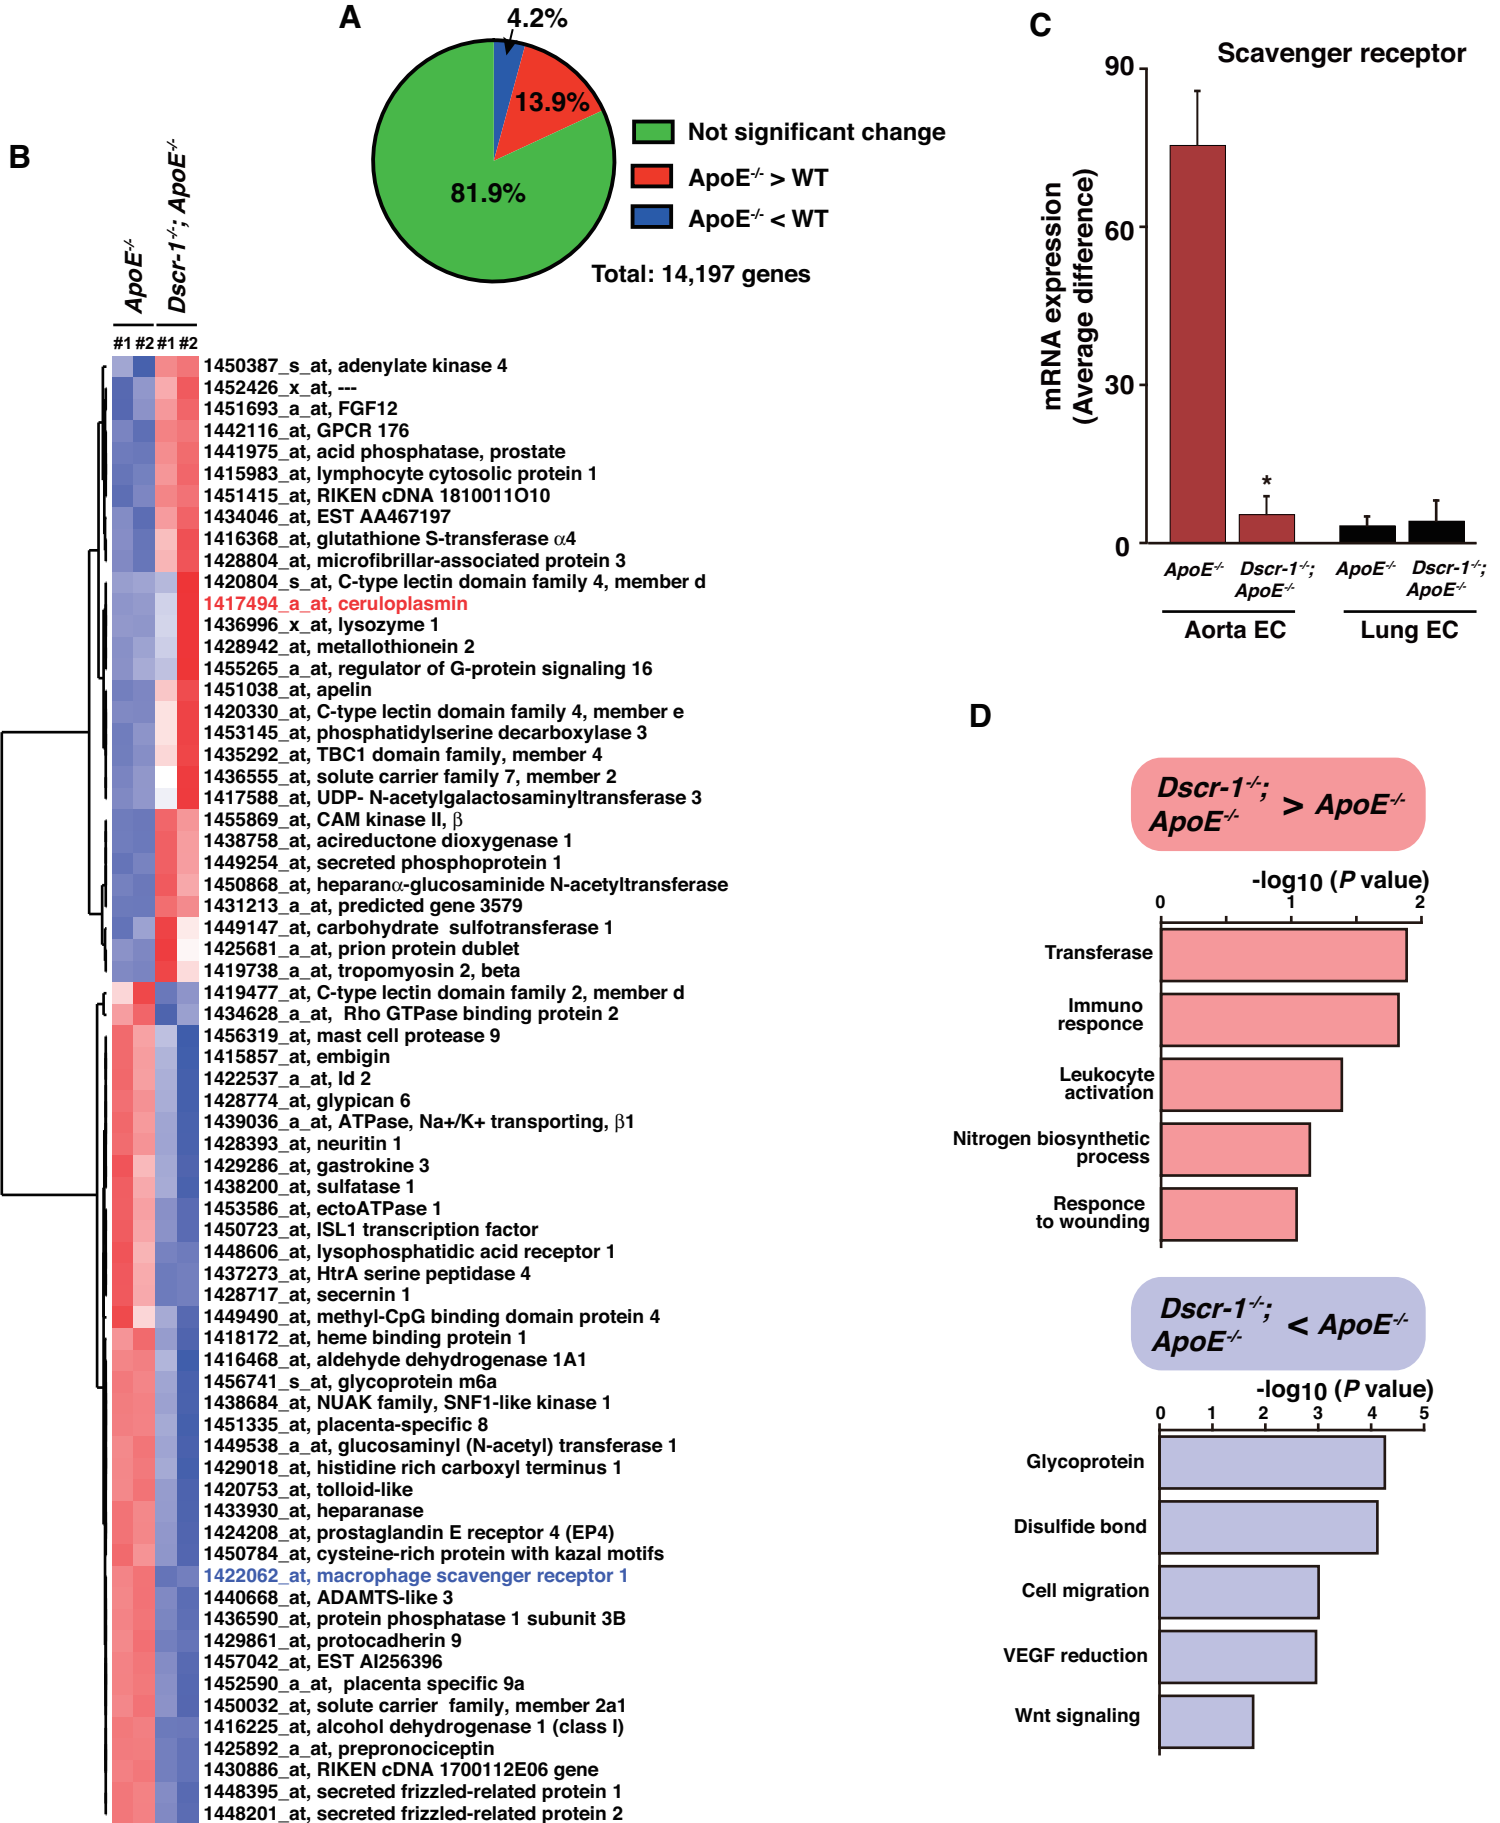

**Figure S4 Loss of Dscr-1 in atherosclerotic aorta changes the unique gene expression pattern.**

(A) Pie chart illustration of changed gene set of aortic endothelial cell (EC)s from ApoE<sup>-/-</sup> and WT. More than two-fold reduced (blue), induced (red), and not changed (green) populations were shown in ApoE<sup>-/-</sup> compared to WT. (B) Complete heatmap illustration of more than 2-fold up-or downregulated genes derived from two independent microarrays. (C) Average difference of scavenger receptor mRNA expression among ApoE<sup>-/-</sup> and Dscr-1<sup>-/-</sup> plus ApoE<sup>-/-</sup> knockout mice (n=3, mean  $\pm$  SD) \*, P<0.01 compared with ApoE<sup>-/-</sup>. (D) GO analysis of commonly upregulated (upper graph) or downregulated (lower graph) gene set in Dscr-1 plus ApoE combined mutation, compared to ApoE single mutation.
